# Supplementary material for: The Effects of Rhizosphere Inoculation with Pseudomonas mandelii on Formation of Apoplast Barriers, HvPIP2 Aquaporins and Hydraulic Conductance of Barley
Source: MDPI journal article supplement (doi:10.3390/microorganisms10050935), 2022-04-29
Supplement: s1 [file s1]

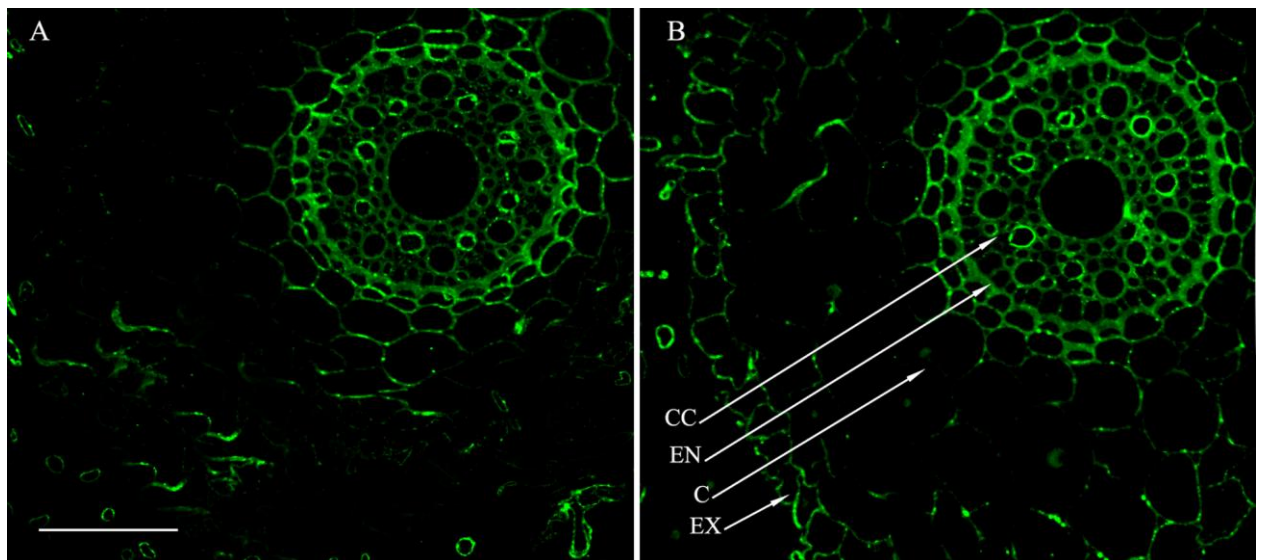

**Figure S1.** Immunolocalization of PIP2;1 aquaporins on cross-sections from root basal part of 8-day-old barley plants untreated (**A**) and in treated with *Pseudomonas mandelii* IB-Ki14 (**B**). The scale bar is 100  $\mu$ m. CC – central cylinder, EN – endodermis, C – cortex, EX – exodermis.

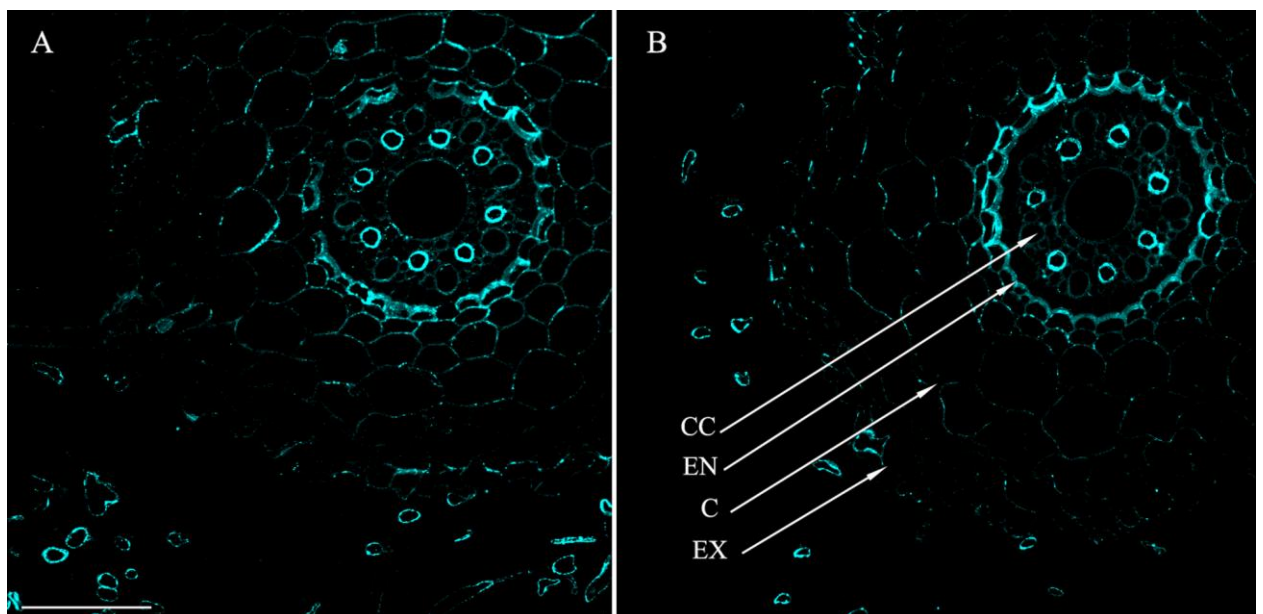

**Figure S2.** Immunolocalization of PIP2;2 aquaporins on cross-sections from root basal part of 8-day-old barley plants untreated (**A**) and in treated with *Pseudomonas mandelii* IB-Ki14 (**B**). The scale bar is 100  $\mu$ m. CC – central cylinder, EN – endodermis, C – cortex, EX – exodermis.
